# Supplementary material for: Venlafaxine XR treatment for older patients with major depressive disorder: decision trees for when to change treatment
Source: HighWire-hosted journal article supplement (doi:10.1136/ebmental-2022-300479), 2022-09-13
Supplement: ebmental-2022-300479supp001_data_supplement.pdf [file ebmental-2022-300479supp001_data_supplement.pdf]

## Supplementary materials

**Supplementary Table 1.** Observed and predicted Montgomery-Asberg Depression Scale (MADRS) scores in 12 weeks of treatment. Imputation was done for MADRS scores at baseline (week 0) and weeks 1, 2, 4, 6, 8, 10, and 12.

| WEEKS           | N                | AVERAGE ± SD        | T-TEST                     |
|-----------------|------------------|---------------------|----------------------------|
| <b>BASELINE</b> | O: 453<br>I: 454 | O: 27±6<br>I: 27±6  | t(905) = -0.014, p = 0.989 |
| <b>1</b>        | O: 442<br>I: 454 | O: 23±8<br>I: 23±8  | t(894) = -0.053, p = 0.958 |
| <b>2</b>        | O: 440<br>I: 454 | O: 20±8<br>I: 20±8  | t(892) = 0.141, p = 0.888  |
| <b>4</b>        | O: 420<br>I: 454 | O: 18±9<br>I: 18±9  | t(872) = -0.063, p = 0.950 |
| <b>6</b>        | O: 411<br>I: 454 | O: 17±9<br>I: 17±9  | t(863) = -0.166, p = 0.868 |
| <b>8</b>        | O: 399<br>I: 454 | O: 15±9<br>I: 15±9  | t(851) = -0.340, p = 0.734 |
| <b>10</b>       | O: 392<br>I: 454 | O: 14±10<br>I: 14±9 | t(844) = -0.196, p = 0.845 |
| <b>12</b>       | O: 94<br>I: 454  | O: 15±8<br>I: 14±7  | t(546) = 1.052, p = 0.293  |

I = Imputed data, O = original data, SD = standard deviation

## Supplementary Material 1. TRIPOD checklist<sup>1</sup>

| Section/Topic             | n  | Checklist Item                                                                                                                                                                                   | Page |
|---------------------------|----|--------------------------------------------------------------------------------------------------------------------------------------------------------------------------------------------------|------|
| <b>Title and abstract</b> |    |                                                                                                                                                                                                  |      |
| Title                     | 1  | Identify the study as developing and/or validating a multivariable prediction model, the target population, and the outcome to be predicted.                                                     | 1    |
| Abstract                  | 2  | Provide a summary of objectives, study design, setting, participants, sample size, predictors, outcome, statistical analysis, results, and conclusions.                                          | 3    |
| <b>Introduction</b>       |    |                                                                                                                                                                                                  |      |
| Background and objectives | 3a | Explain the medical context (including whether diagnostic or prognostic) and rationale for developing or validating the multivariable prediction model, including references to existing models. | 5-6  |
|                           | 3b | Specify the objectives, including whether the study describes the development or validation of the model or both.                                                                                | 5-6  |

| <b>Methods</b>               |     |                                                                                                                                                                                                       |                                     |
|------------------------------|-----|-------------------------------------------------------------------------------------------------------------------------------------------------------------------------------------------------------|-------------------------------------|
| Source of data               | 4a  | Describe the study design or source of data (e.g., randomized trial, cohort, or registry data), separately for the development and validation data sets, if applicable.                               | 6                                   |
|                              | 4b  | Specify the key study dates, including start of accrual; end of accrual; and, if applicable, end of follow-up.                                                                                        | 6                                   |
| Participants                 | 5a  | Specify key elements of the study setting (e.g., primary care, secondary care, general population) including number and location of centres.                                                          | Referenced study with these details |
|                              | 5b  | Describe eligibility criteria for participants.                                                                                                                                                       | Referenced study with these details |
|                              | 5c  | Give details of treatments received, if relevant.                                                                                                                                                     | 6                                   |
| Outcome                      | 6a  | Clearly define the outcome that is predicted by the prediction model, including how and when assessed.                                                                                                | 7-9                                 |
|                              | 6b  | Report any actions to blind assessment of the outcome to be predicted.                                                                                                                                | N/A                                 |
| Predictors                   | 7a  | Clearly define all predictors used in developing or validating the multivariable prediction model, including how and when they were measured.                                                         | 6-7, 9                              |
|                              | 7b  | Report any actions to blind assessment of predictors for the outcome and other predictors.                                                                                                            | Not done                            |
| Sample size                  | 8   | Explain how the study size was arrived at.                                                                                                                                                            | 9                                   |
| Missing data                 | 9   | Describe how missing data were handled (e.g., complete-case analysis, single imputation, multiple imputation) with details of any imputation method.                                                  | 7                                   |
| Statistical analysis methods | 10a | Describe how predictors were handled in the analyses.                                                                                                                                                 | 9                                   |
|                              | 10b | Specify type of model, all model-building procedures (including any predictor selection), and method for internal validation.                                                                         | 9                                   |
|                              | 10d | Specify all measures used to assess model performance and, if relevant, to compare multiple models.                                                                                                   | 10                                  |
| Risk groups                  | 11  | Provide details on how risk groups were created, if done.                                                                                                                                             | N/A                                 |
| <b>Results</b>               |     |                                                                                                                                                                                                       |                                     |
| Participants                 | 13a | Describe the flow of participants through the study, including the number of participants with and without the outcome and, if applicable, a summary of the follow-up time. A diagram may be helpful. | 10-11                               |
|                              | 13b | Describe the characteristics of the participants (basic demographics, clinical features, available predictors), including the number of participants with missing data for predictors and outcome.    | 10-11, Table 1                      |
| Model development            | 14a | Specify the number of participants and outcome events in each analysis.                                                                                                                               | 14-15, Figure 1                     |
|                              | 14b | If done, report the unadjusted association between each candidate predictor and outcome.                                                                                                              | Not done.                           |

|                           |     |                                                                                                                                                                             |                                                |
|---------------------------|-----|-----------------------------------------------------------------------------------------------------------------------------------------------------------------------------|------------------------------------------------|
| Model specification       | 15a | Present the full prediction model to allow predictions for individuals (i.e., all regression coefficients, and model intercept or baseline survival at a given time point). | Figure 1.                                      |
|                           | 15b | Explain how to use the prediction model.                                                                                                                                    | 14-15                                          |
| Model performance         | 16  | Report performance measures (with CIs) for the prediction model.                                                                                                            | 14-15                                          |
| <b>Discussion</b>         |     |                                                                                                                                                                             |                                                |
| Limitations               | 18  | Discuss any limitations of the study (such as nonrepresentative sample, few events per predictor, missing data).                                                            | 17                                             |
| Interpretation            | 19b | Give an overall interpretation of the results, considering objectives, limitations, and results from similar studies, and other relevant evidence.                          | 15                                             |
| Implications              | 20  | Discuss the potential clinical use of the model and implications for future research.                                                                                       | 17                                             |
| <b>Other information</b>  |     |                                                                                                                                                                             |                                                |
| Supplementary information | 21  | Provide information about the availability of supplementary resources, such as study protocol, Web calculator, and data sets.                                               | Done throughout the manuscript as appropriate. |
| Funding                   | 22  | Give the source of funding and the role of the funders for the present study.                                                                                               | 19                                             |

<sup>1</sup> Collins GS, Reitsma JB, Altman DG, et al. Transparent reporting of a multivariable prediction model for individual prognosis or diagnosis (TRIPOD): the TRIPOD statement. *BMJ* 2015;350:g7594. doi: 10.1136/bmj.g7594.

## Supplementary Material 2. Sample size calculation using Riley and colleagues' method<sup>2</sup>

Riley and colleagues recommend a new sample size approach where the minimum sample size must fit the following criteria: i) global shrinkage factor greater than or equal to 0.5, representing a small optimism in predictor effect estimates; ii) there is a difference of less than or equal to 0.05 between adjusted and apparent Nagelkerke's  $R^2$ ; and iii) sample size allows for precise estimation of overall risk (corresponds to prevalence in our model)<sup>2</sup>. Criteria 1 and 2 aim to reduce the risk of the model being overfitted to the training dataset, and criterion 3 aims to ensure precise estimation of risk/prevalence. Please refer to Riley and colleagues<sup>2</sup> article for the formulas. Our model has a total of 14 parameters. We obtained  $n$  (number of participants; 219) and  $E$  (number of events; 105) from Joel and colleagues' analysis, which used a complete sample from the IRL-Grey study to perform logistic regression to predict remission<sup>3</sup>. Global shrinkage factor was set to 0.90 and Nagelkerke  $R^2$  was set to 0.5 as recommended by Riley and

colleagues because it was not reported by Joel and colleagues and one of the predictors included a direct measurement (i.e., baseline MADRS). Minimum sample size according to criteria 1, 2, and 3 were 260, 290, and 384, respectively.

## References

1. Collins GS, Reitsma JB, Altman DG, et al. Transparent reporting of a multivariable prediction model for individual prognosis or diagnosis (TRIPOD): the TRIPOD statement. *BMJ* 2015;350:g7594. doi: 10.1136/bmj.g7594
2. Riley RD, Snell KI, Ensor J, et al. Minimum sample size for developing a multivariable prediction model: PART II - binary and time-to-event outcomes. *Stat Med* 2019;38(7):1276-96. doi: 10.1002/sim.7992
3. Joel I, Begley AE, Mulsant BH, et al. Dynamic prediction of treatment response in late-life depression. *Am J Geriatr Psychiatry* 2014;22(2):167-76. doi: 10.1016/j.jagp.2012.07.002
